# Supplementary material for: Intramolecular Carbene C-H Insertion Reactions of 2-Diazo-2-sulfamoylacetamides
Source: MDPI journal article supplement (doi:10.3390/molecules24142628), 2019-07-19

# **Intramolecular carbene C-H insertion reactions of 2-diazo-2-sulfamoylacetamides**

Chuqiang Que<sup>‡</sup>, Peipei Huang<sup>‡</sup>, Zhanhui Yang, Ning Chen, and Jiayi Xu\*

State Key Laboratory of Chemical Resource Engineering, Department of Organic  
Chemistry, College of Chemistry, Beijing University of Chemical Technology, Beijing  
100029, P. R. China

## **Supporting Information**

### **Content**

Copies of <sup>1</sup>H and <sup>13</sup>C NMR spectra of unknown compounds.....S2

## Copies of $^1\text{H}$ and $^{13}\text{C}$ NMR spectra of unknown compounds

### 2-(*N*-Benzyl-*N*-butylsulfamoyl)-*N,N*-diphenyl acetamide (7c):

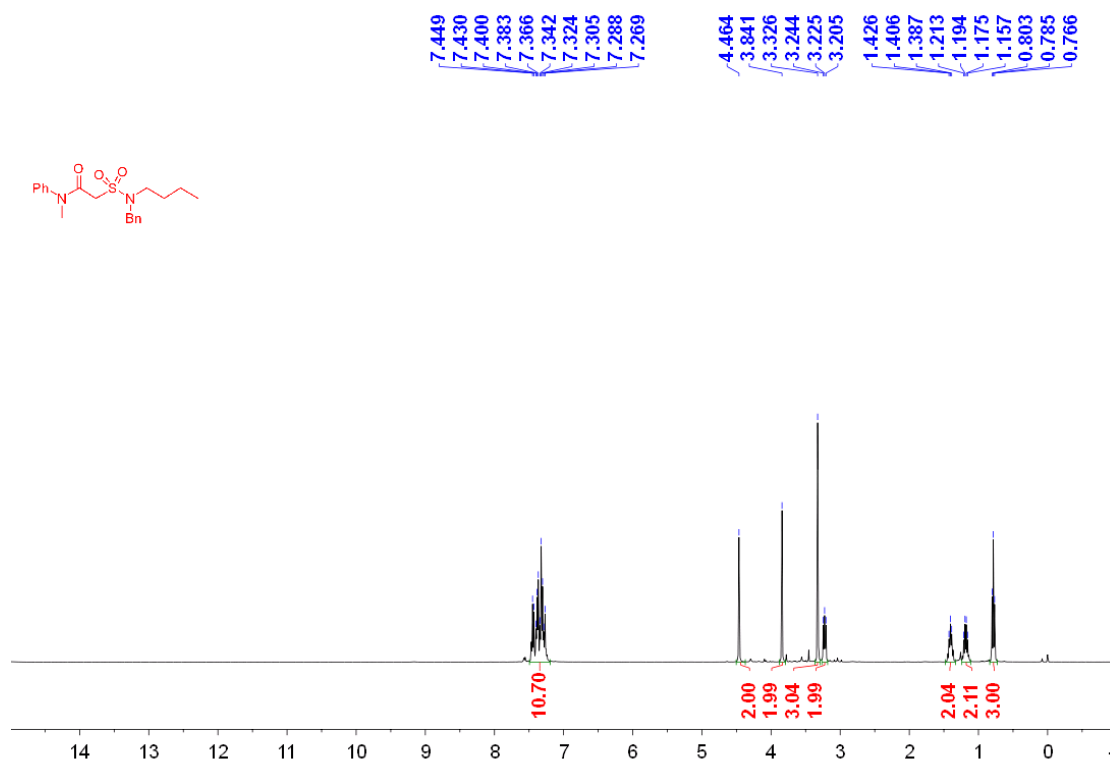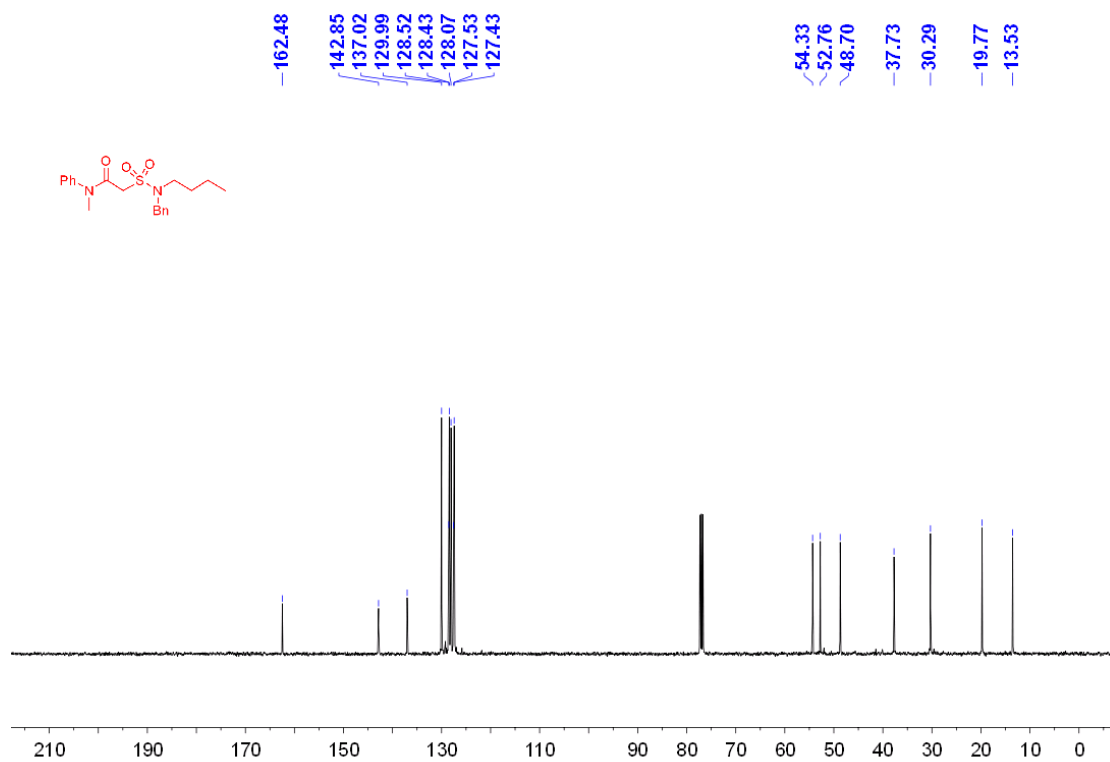

## 2-(*N*-Benzyl-*N*-butylsulfamoyl)-*N,N*-diphenyl acetamide (7d)

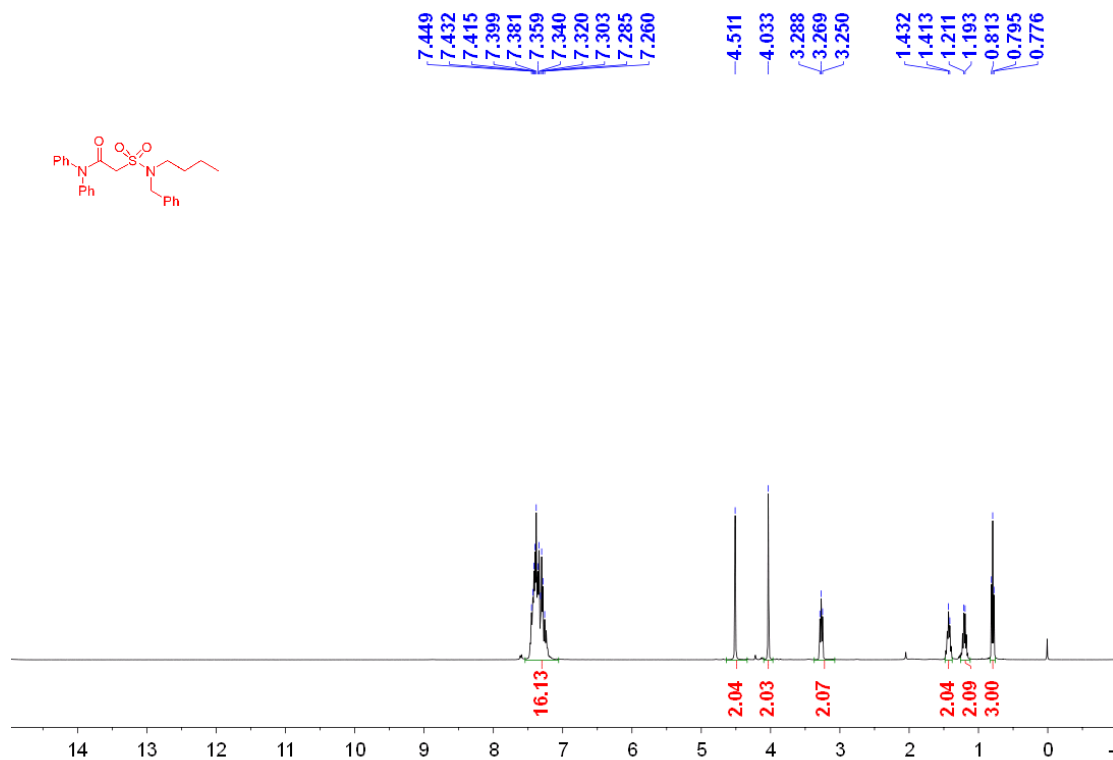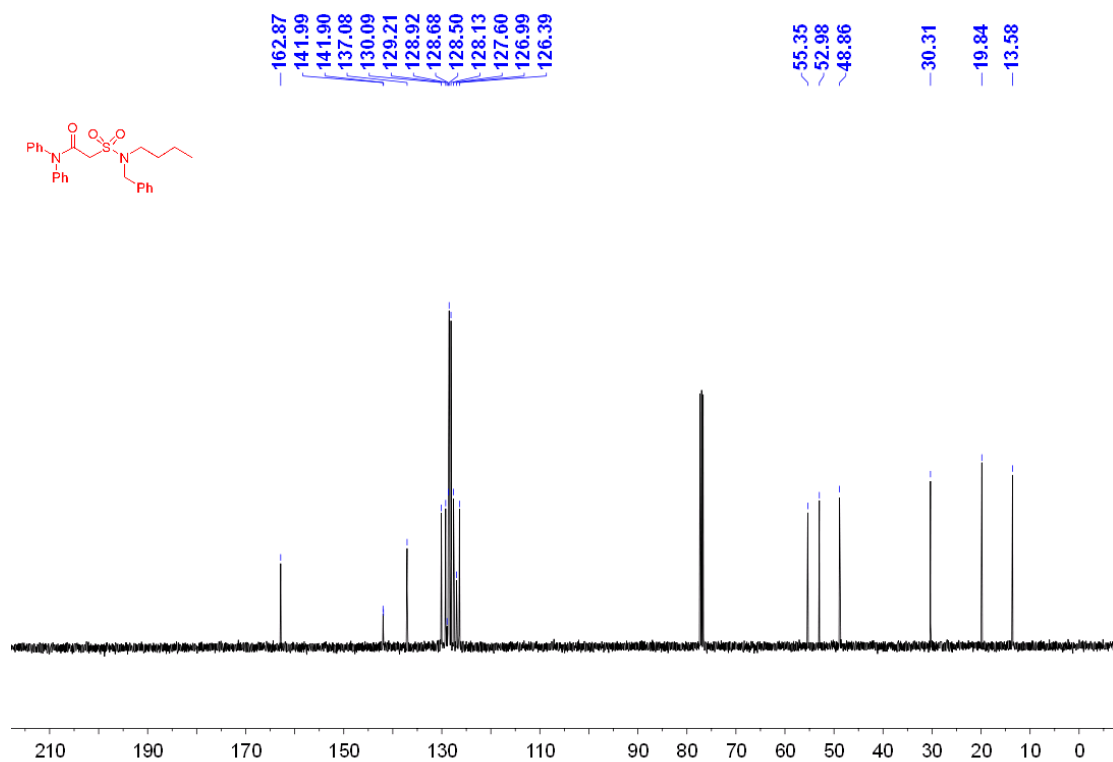

***N*-Methyl-2-(*N*-methyl-*N*-phenylsulfamoyl)-*N*-phenylacetamide (7e):**

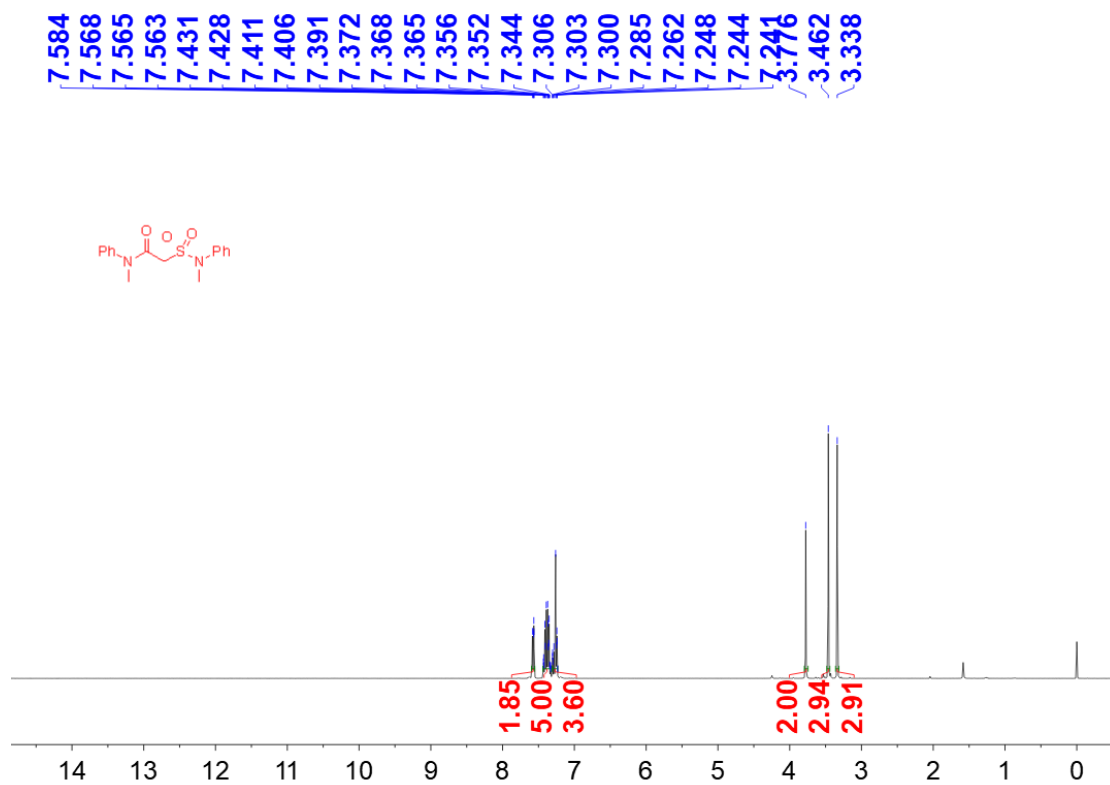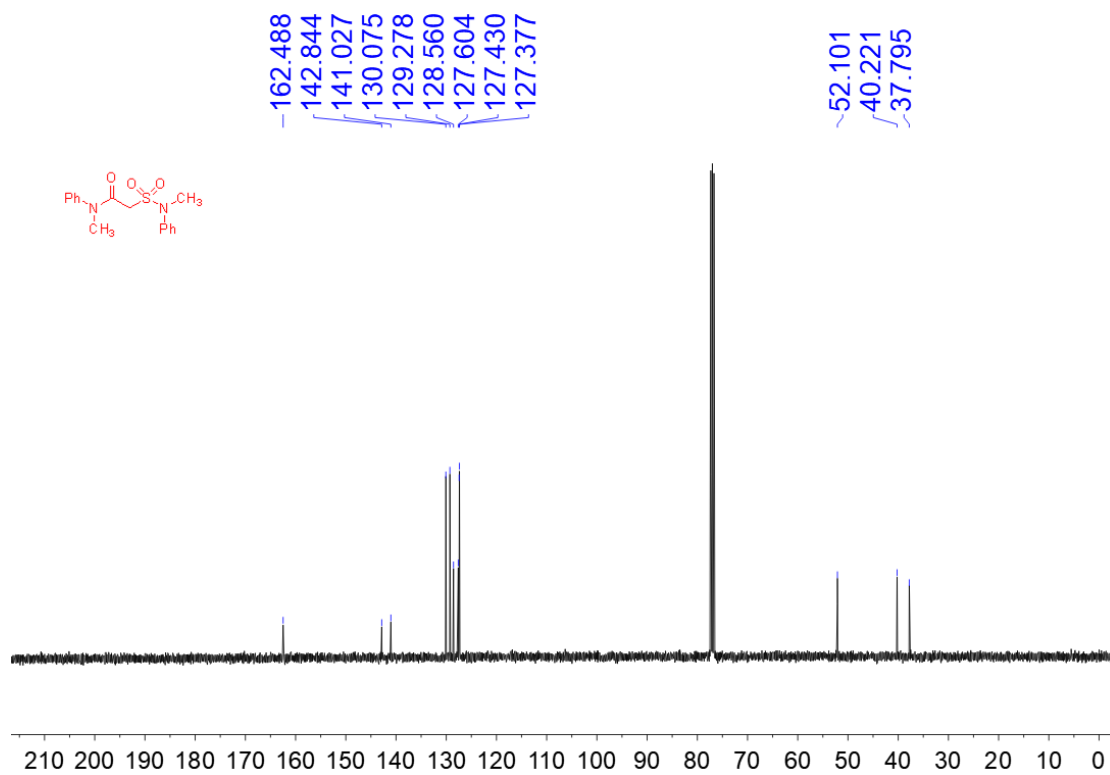

***N*-Methyl-*N*-phenyl-2-(*N,N*-diphenylsulfamoyl)acetamide (7f)**

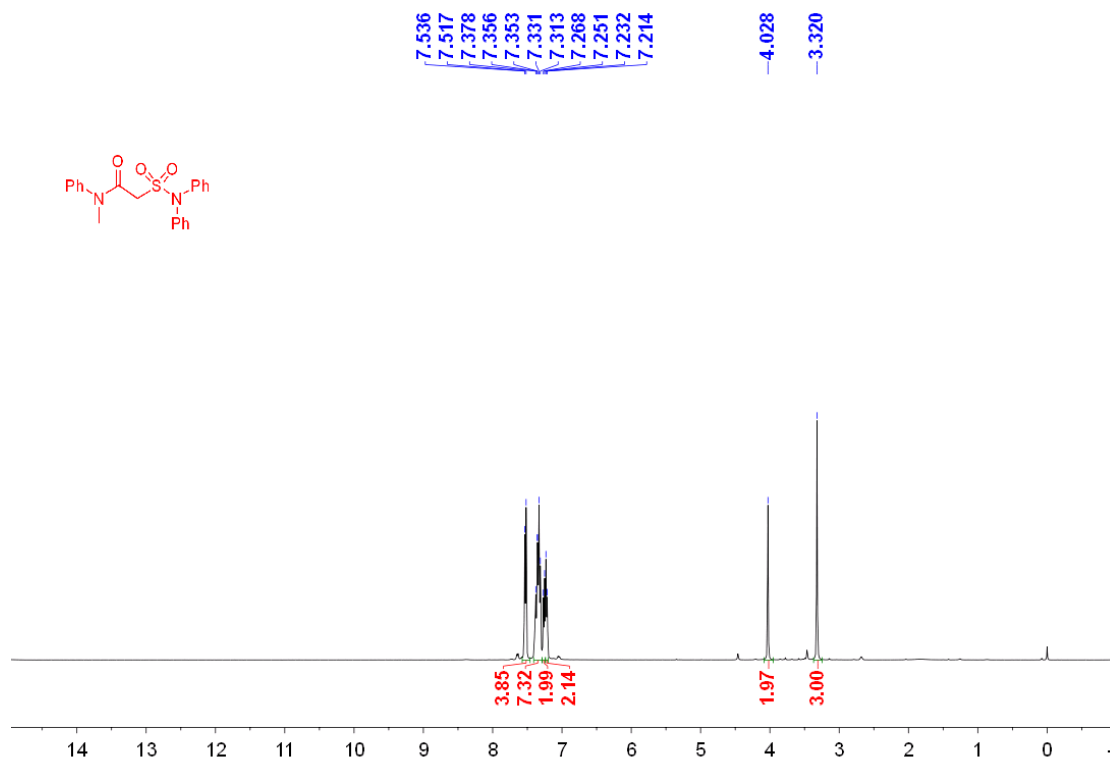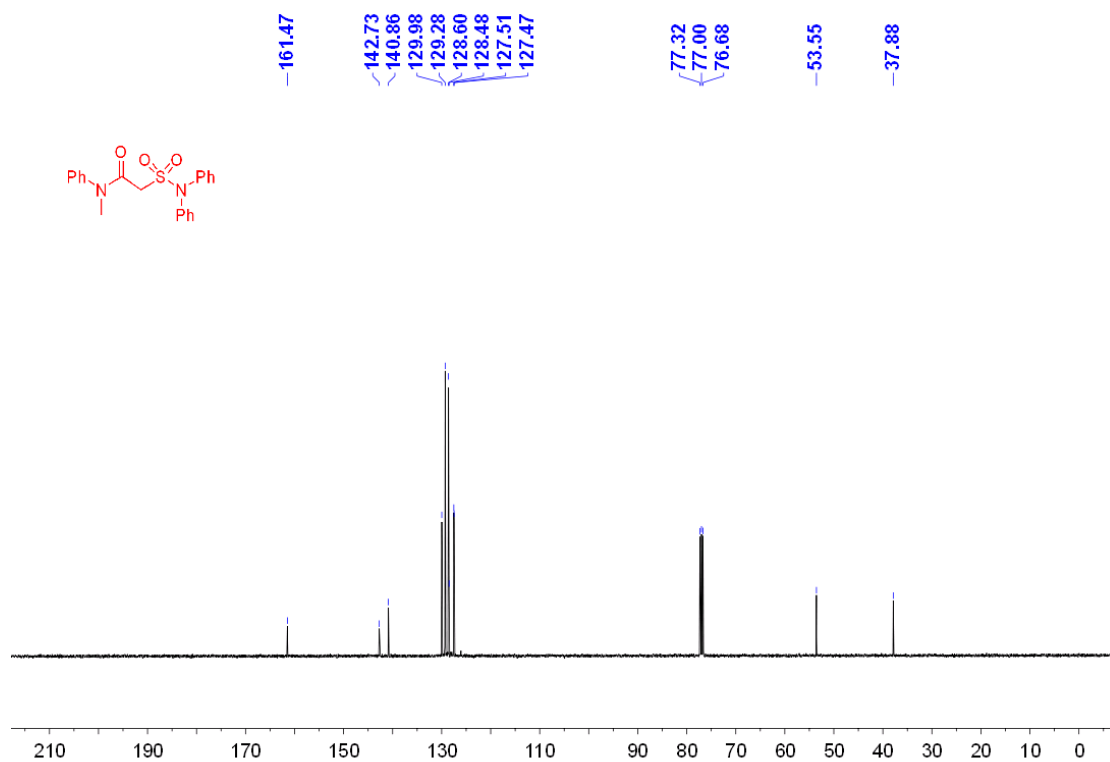

**2-(*N*-Methyl-*N*-phenylsulfamoyl)-*N,N*-diphenylacetamide (7g):**

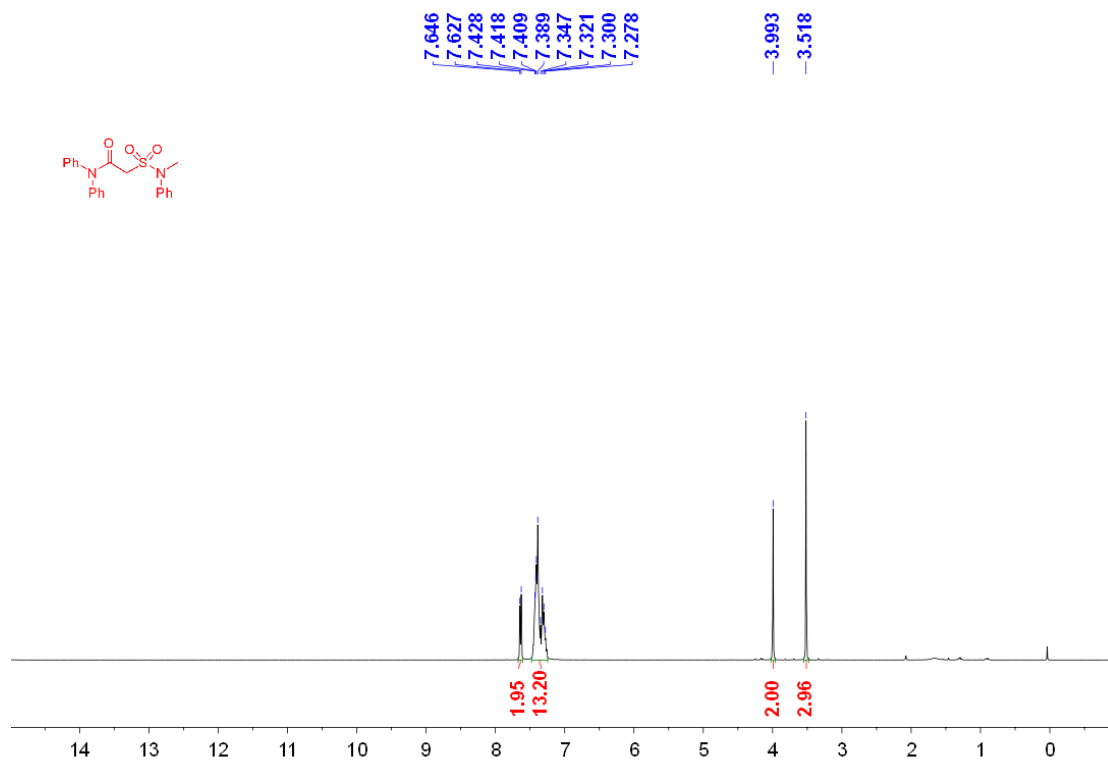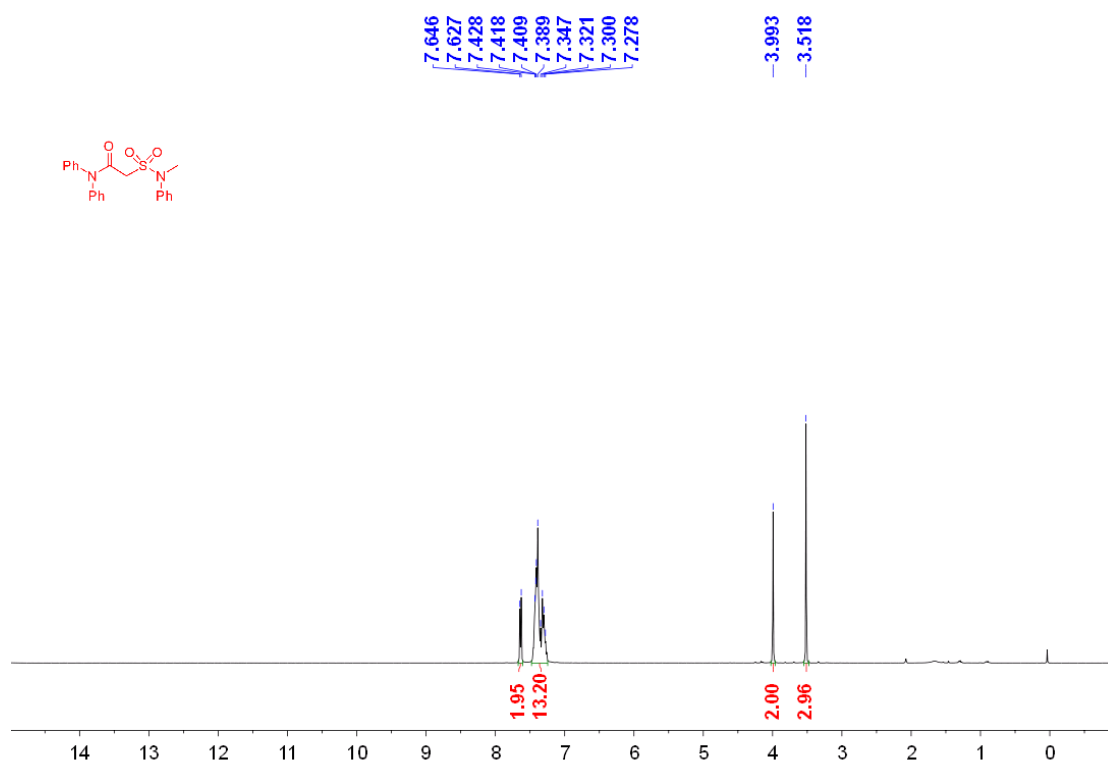

***N,N*-Diphenyl-2-(*N,N*-diphenylsulfamoyl)acetamide (7h):**

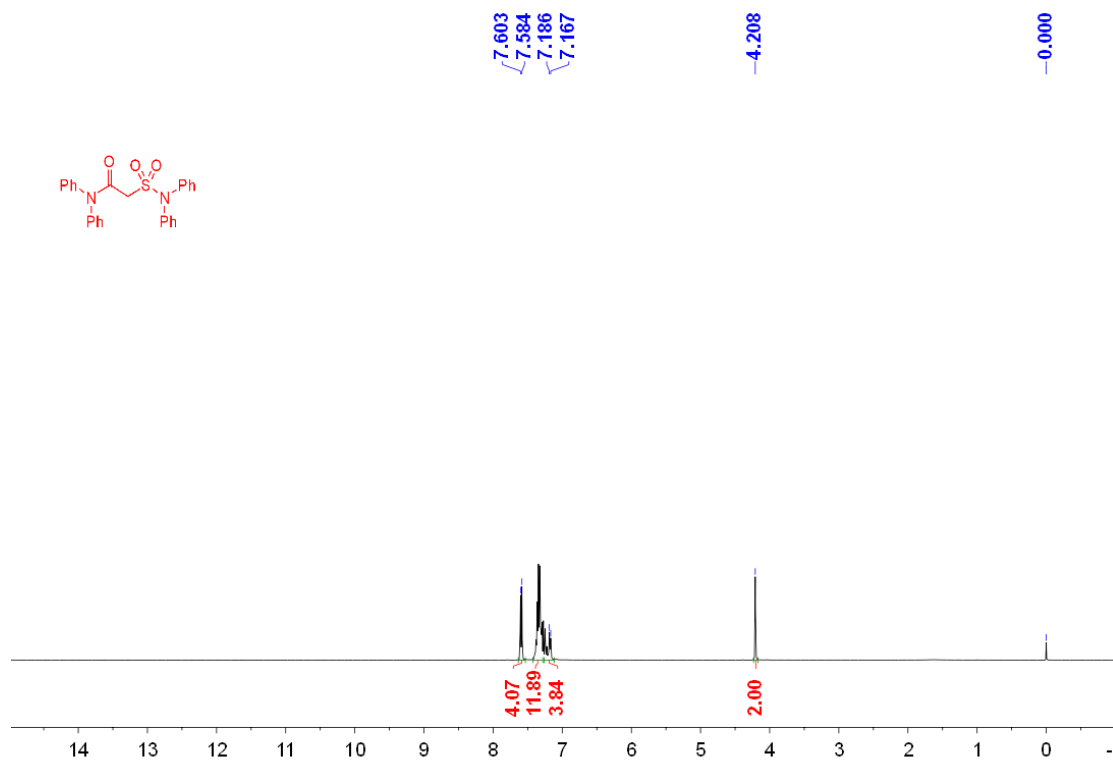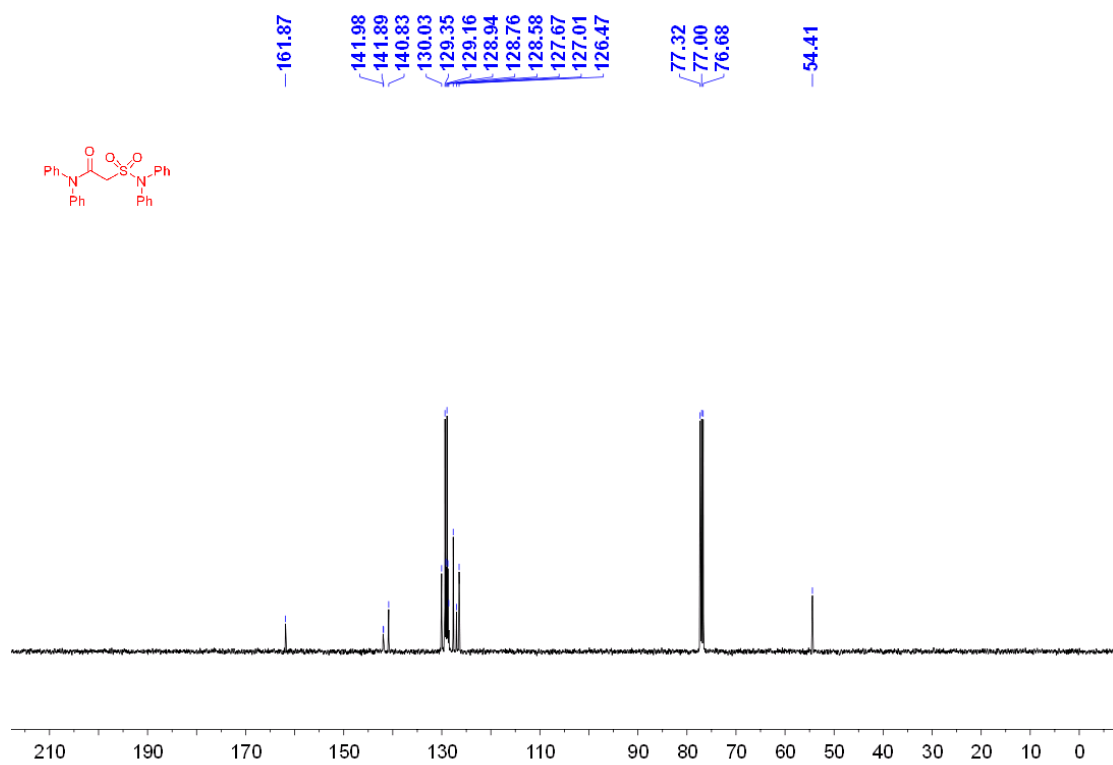

2-(*N*-Benzyl-*N*-butylsulfamoyl)-2-diazo-*N*-methyl-*N*-phenylacetamide (1c)

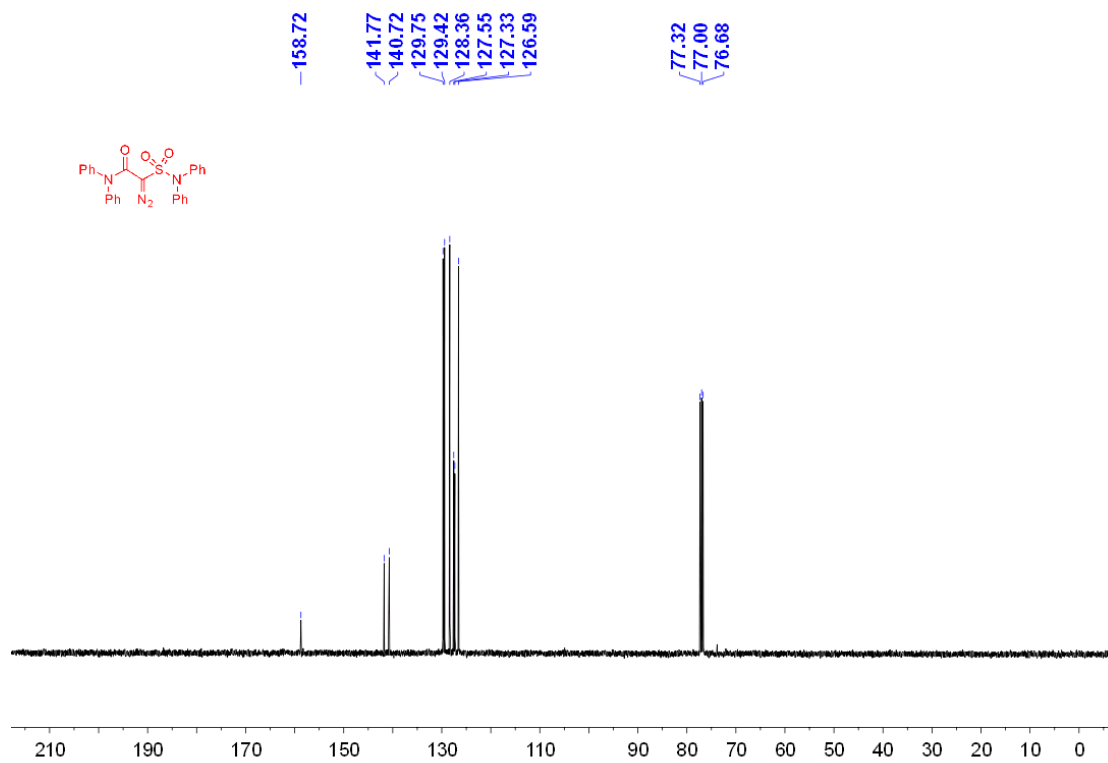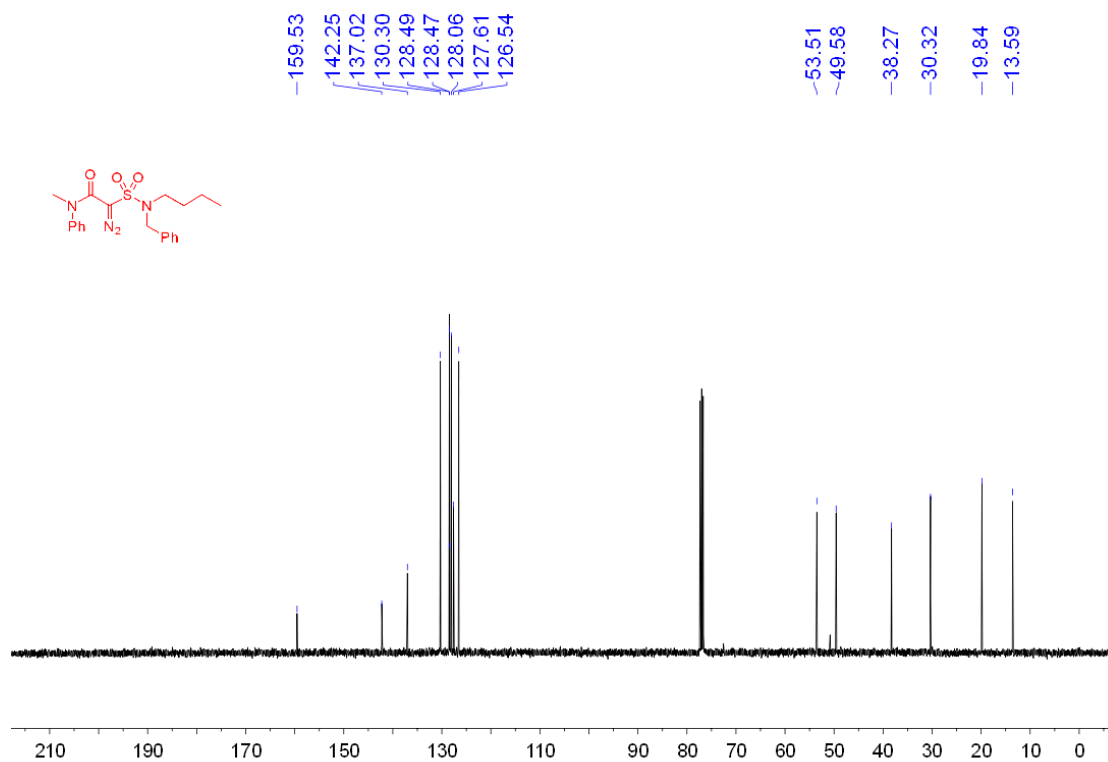



2-(*N*-Benzyl-*N*-butylsulfamoyl)-2-diazo-*N,N*-diphenyl acetamide (1d)

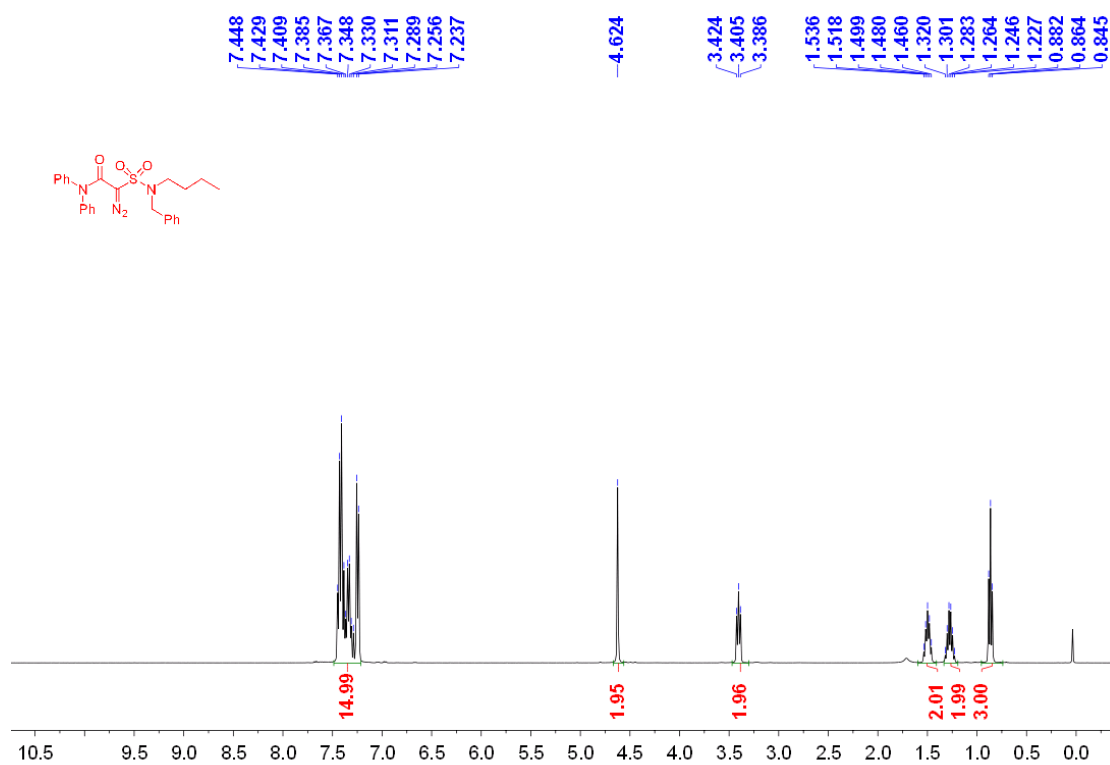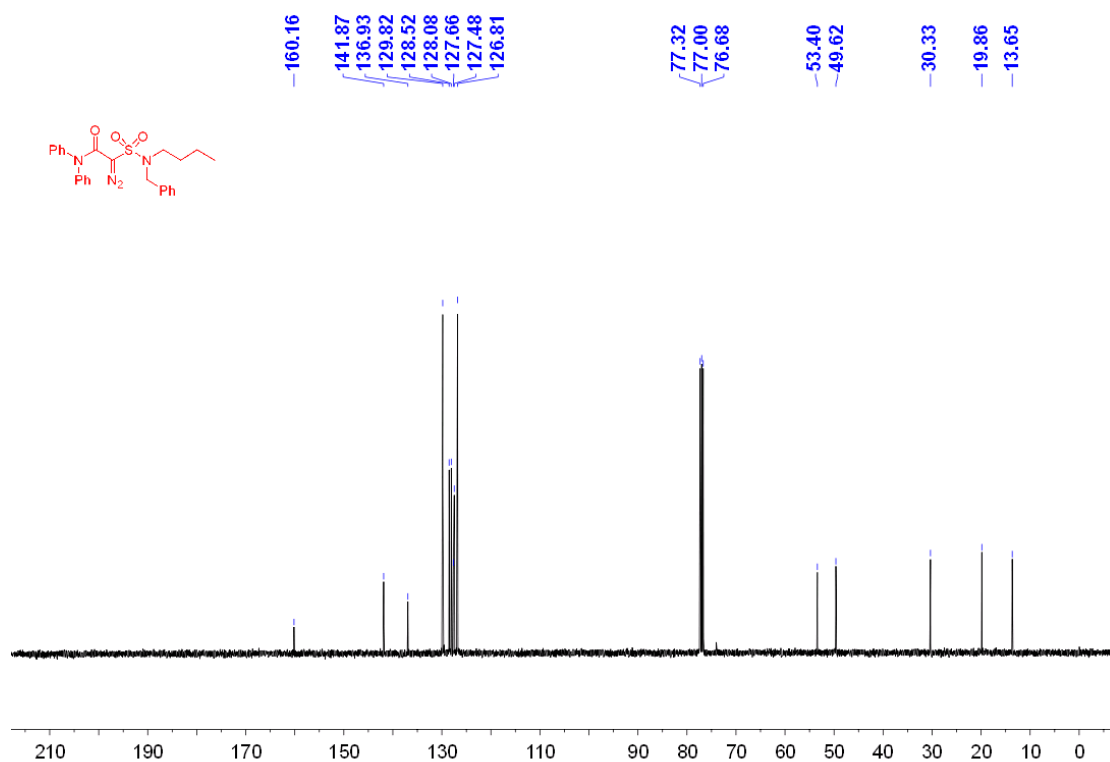

**2-Diazo-N-methyl-2-(N-methyl-N-phenylsulfamoyl)-N-phenylacetamide (1e):**

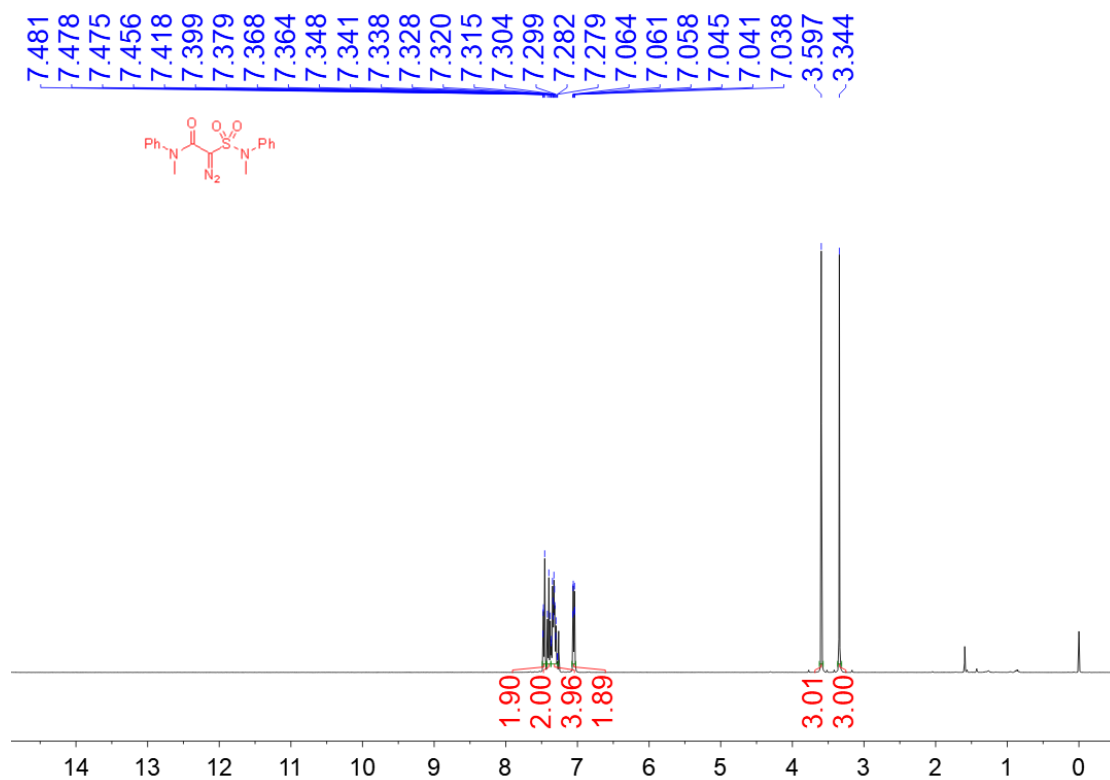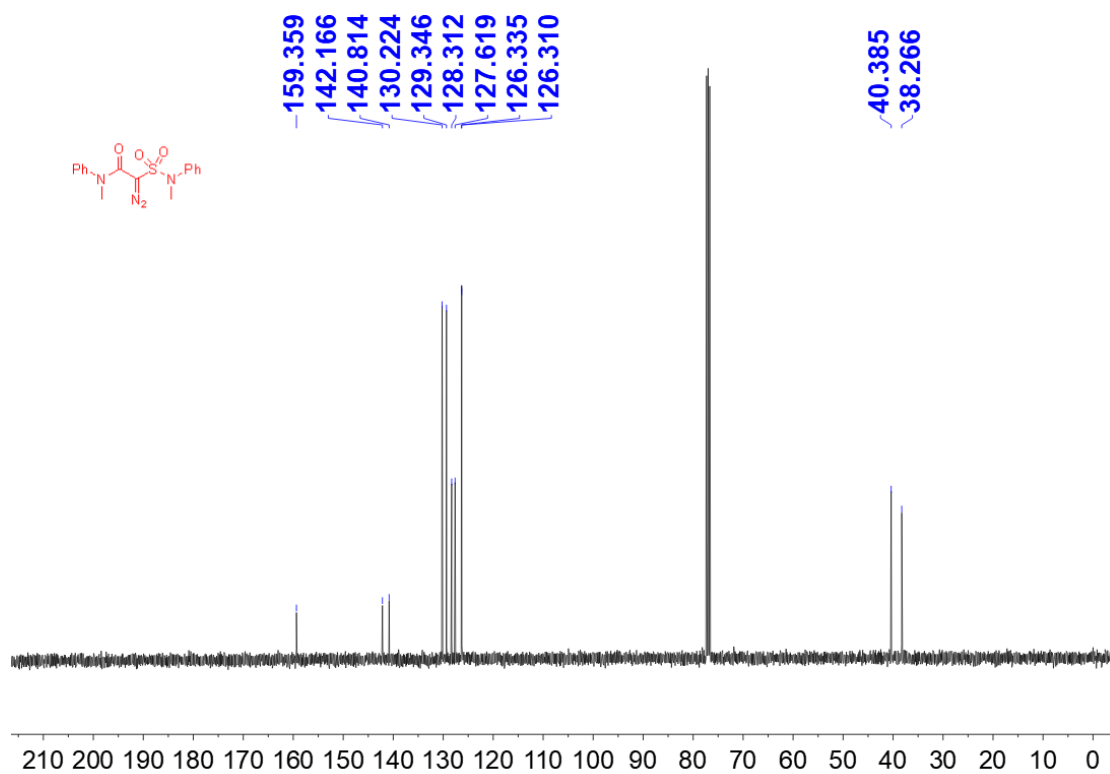

### 2-Diazo-N-methyl-N-phenyl-2-(N,N-diphenylsulfamoyl)acetamide (1f)

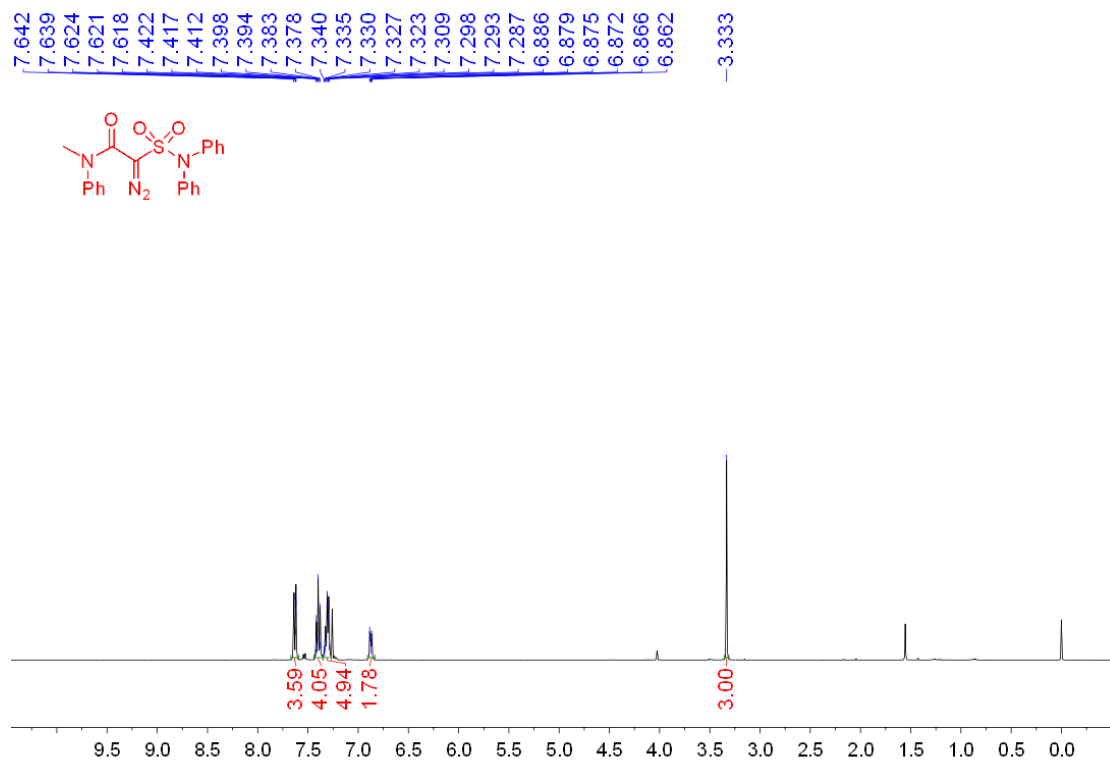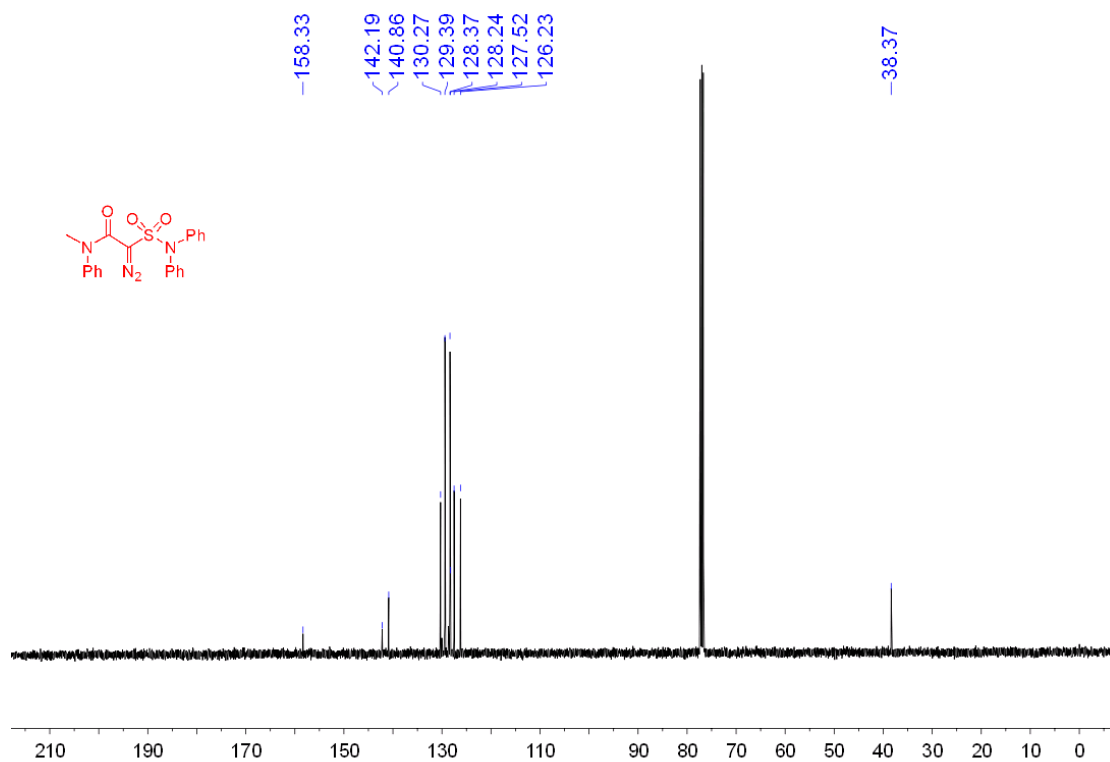

**2-Diazo-2-(*N*-methyl-*N*-phenylsulfamoyl)-*N,N*-diphenylacetamide (1g):**

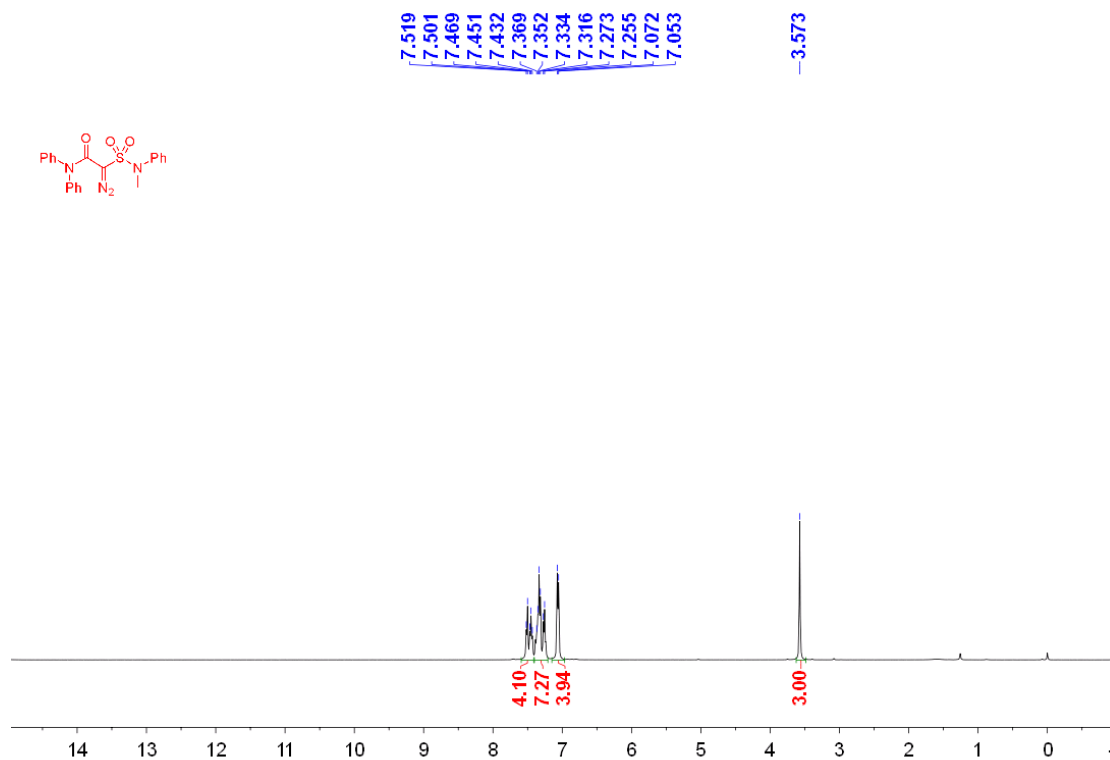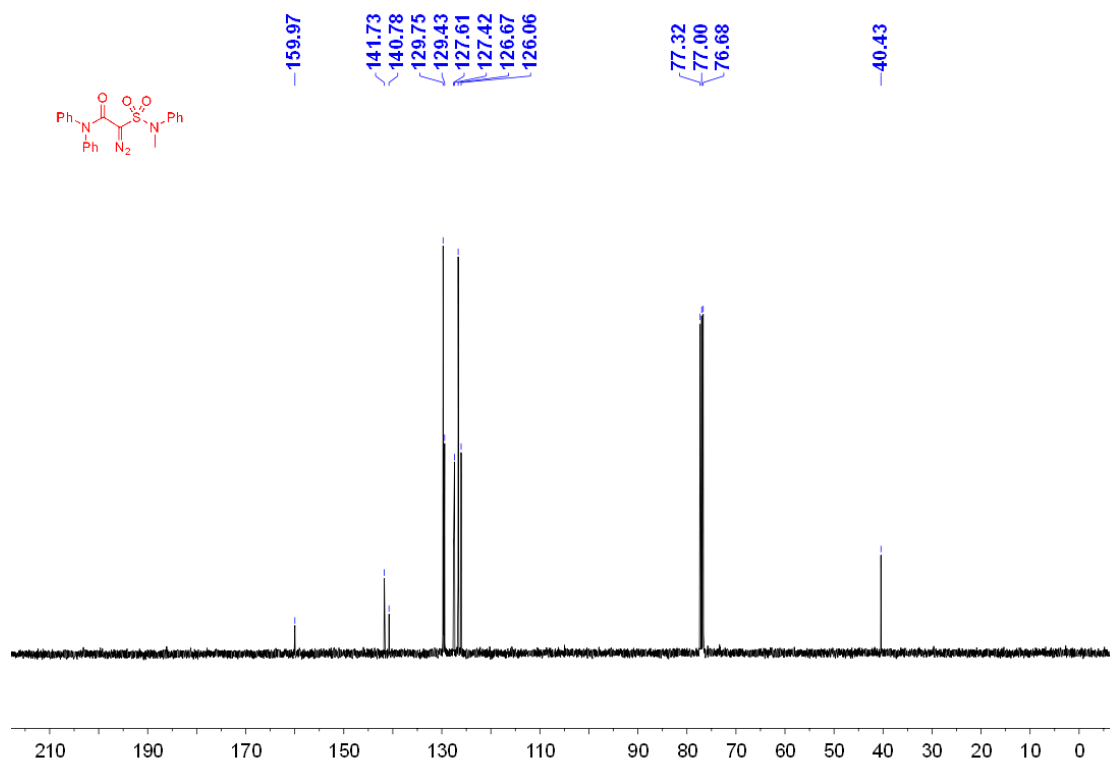

### 2-Diazo-*N,N*-diphenyl-2-(*N,N*-diphenylsulfamoyl)acetamide (1h)

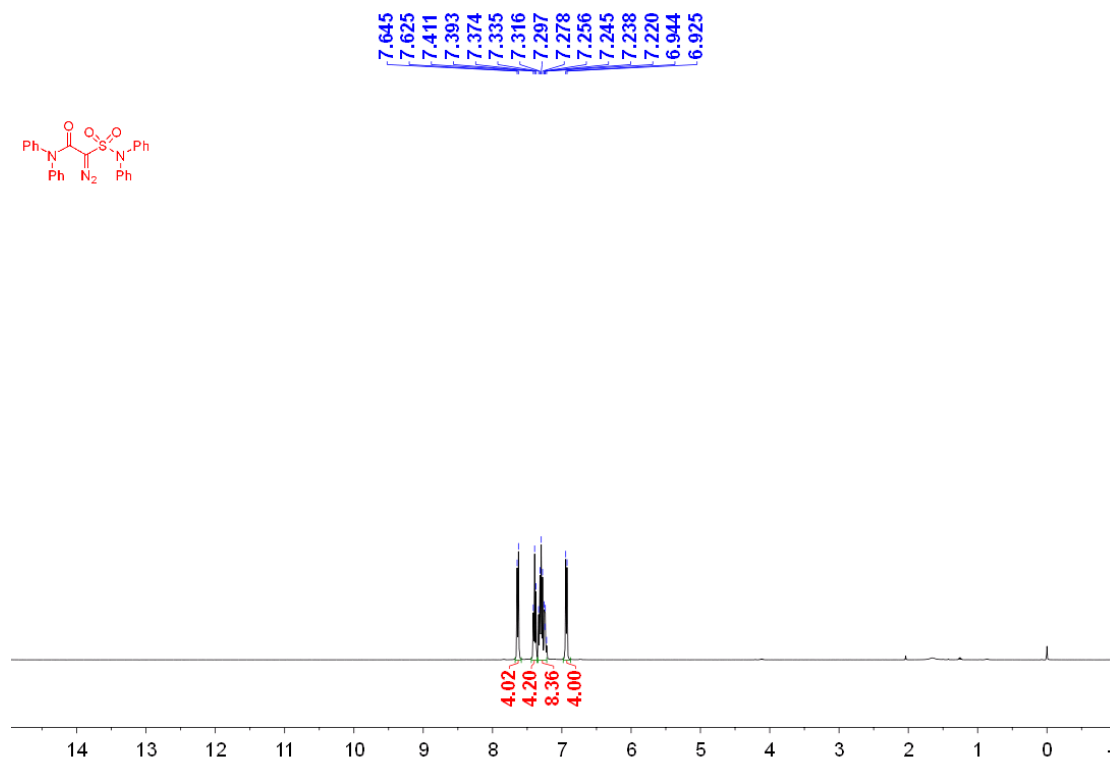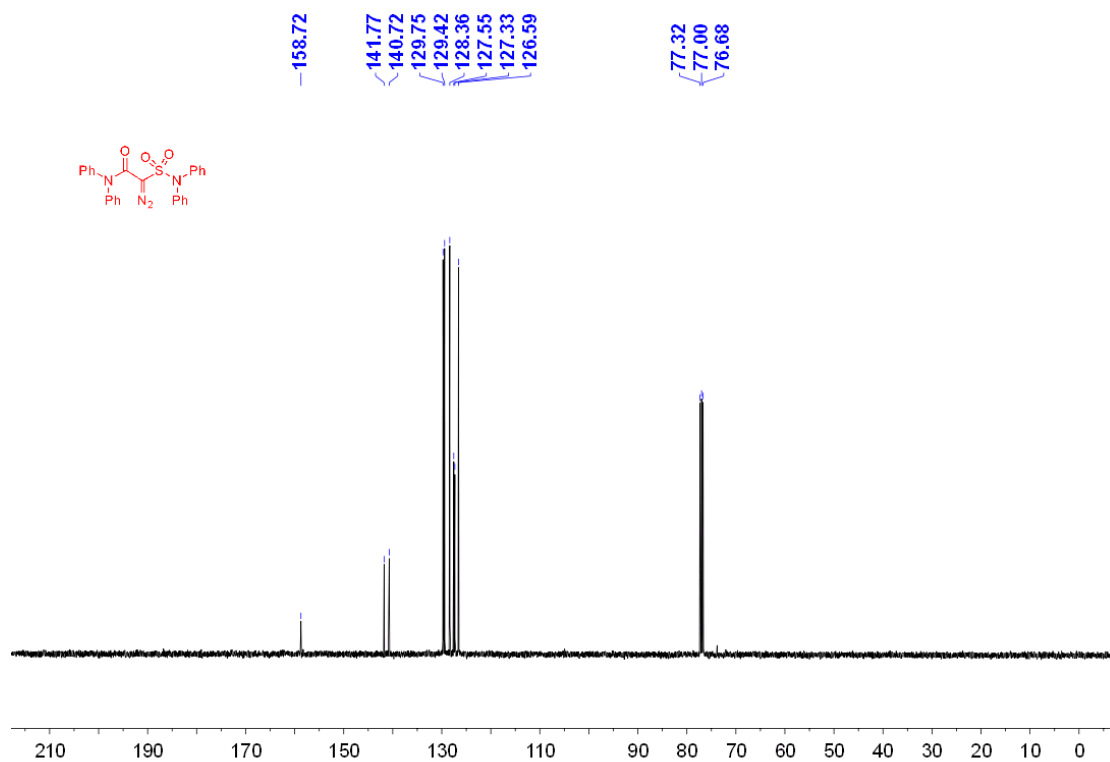

***N,N*-Dimethyl-2,2-dioxido-1-phenyl-1,3-dihydrobenzo[*c*]isothiazole-3-carboxamide (2b):**

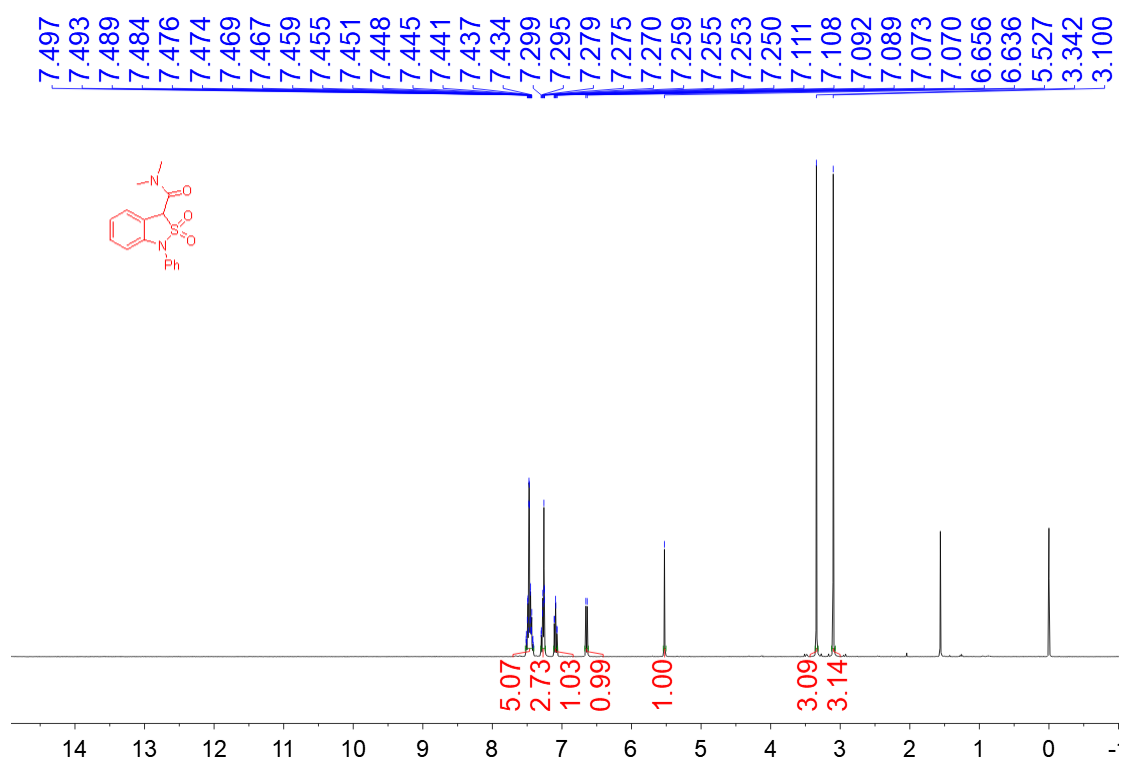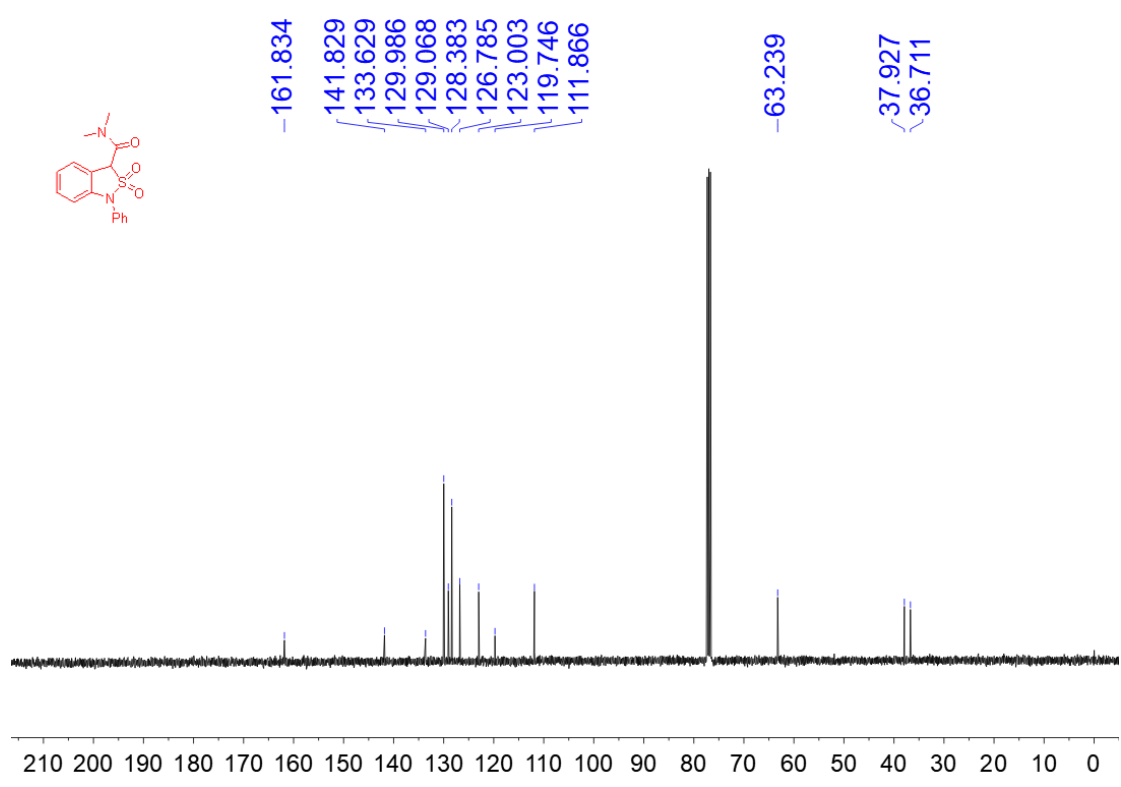

***N*-Benzyl-*N*-butyl-2-oxo-1-methylindoline-3-sulfonamide (3c)**

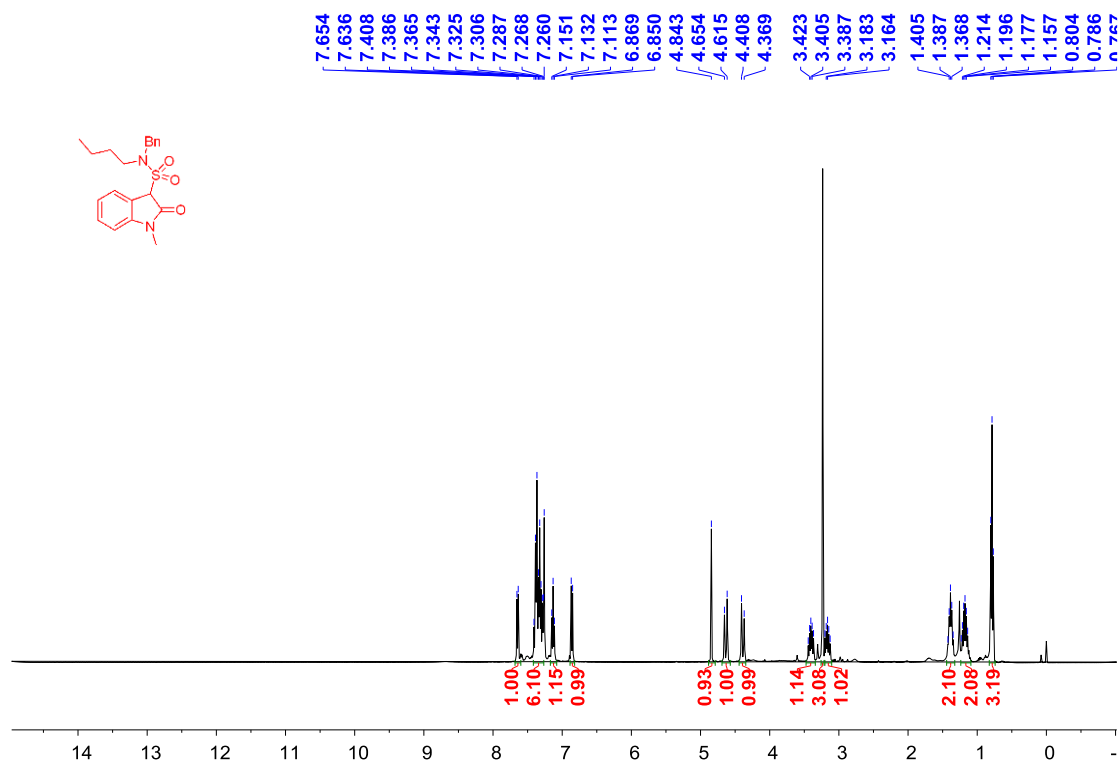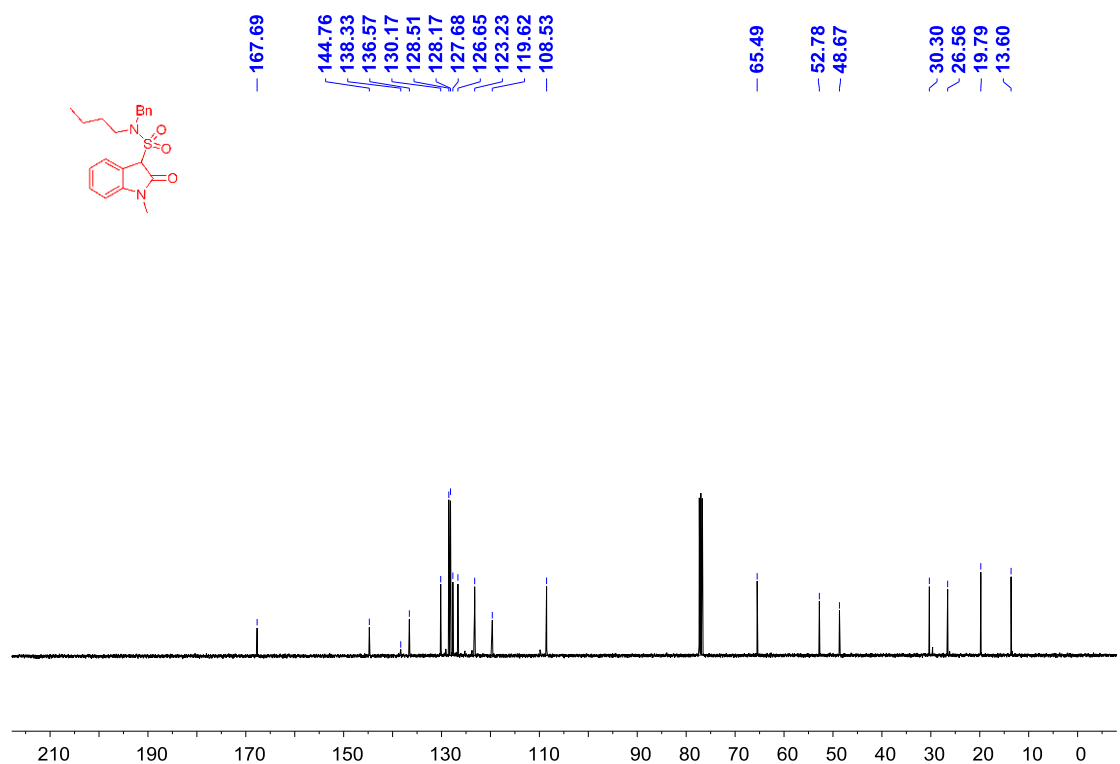

***N*-Benzyl-*N*-butyl-2-oxo-1-phenylindoline-3-sulfonamide (3d)**

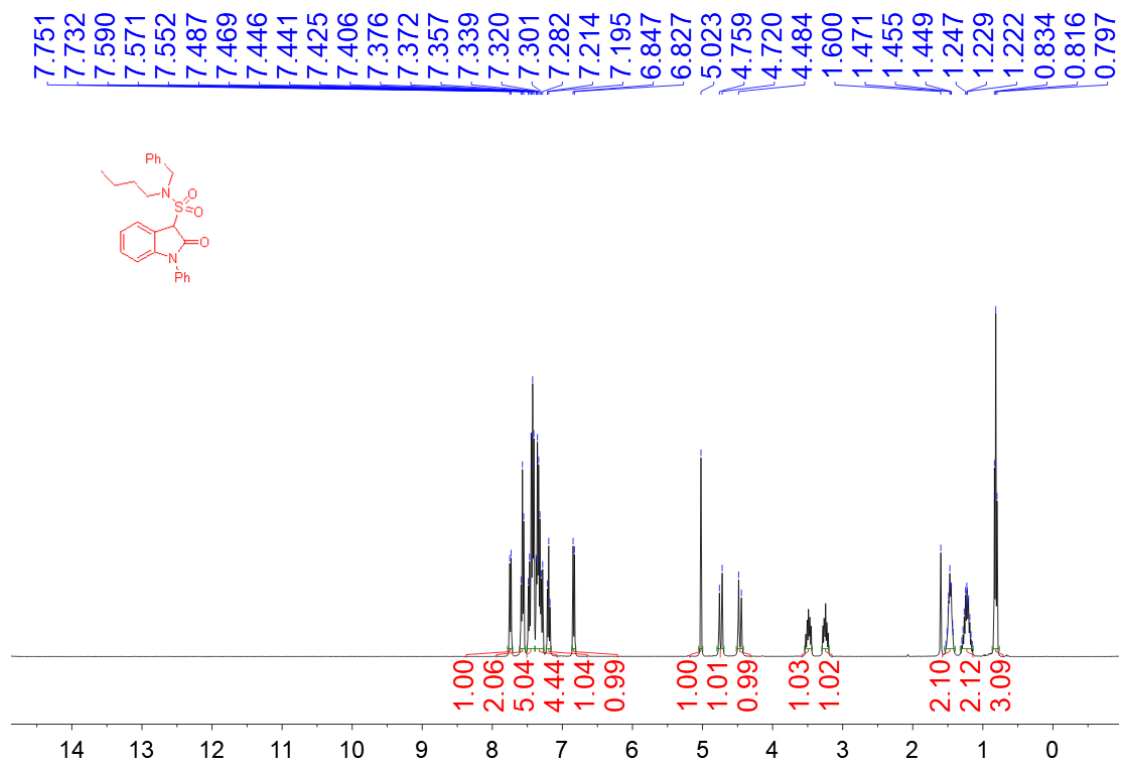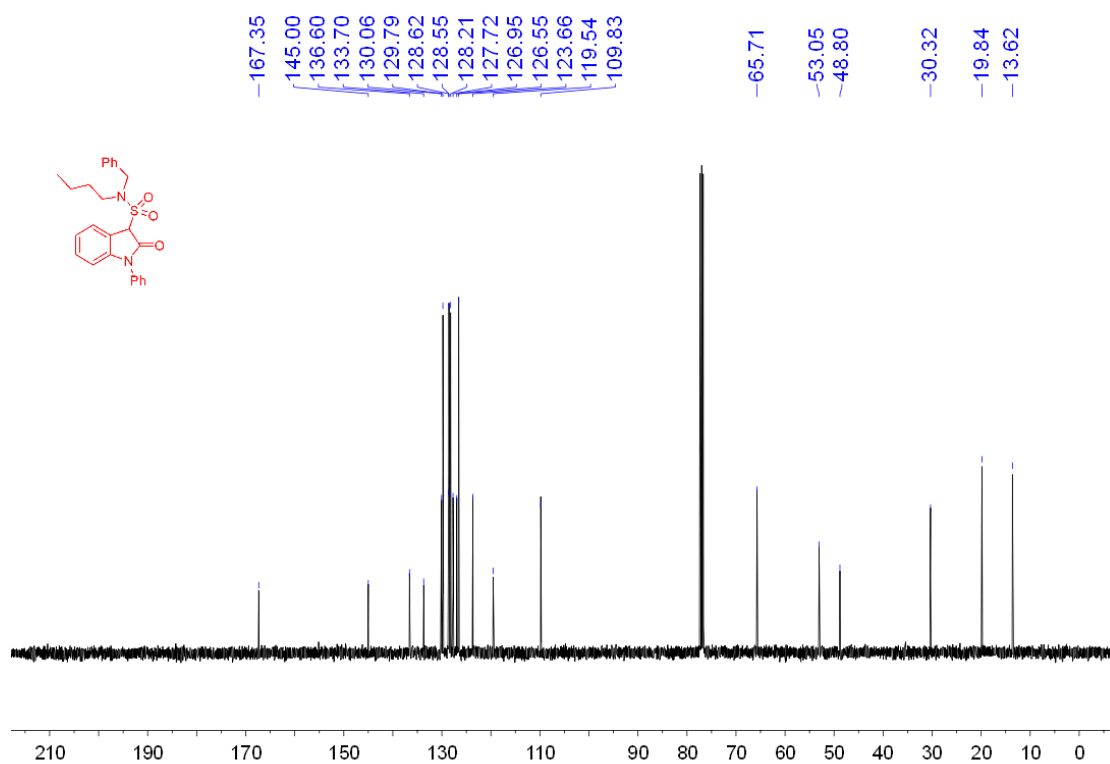



***N*,1-Dimethyl-2-oxo-*N*-phenylindoline-3-sulfonamide (3e):**

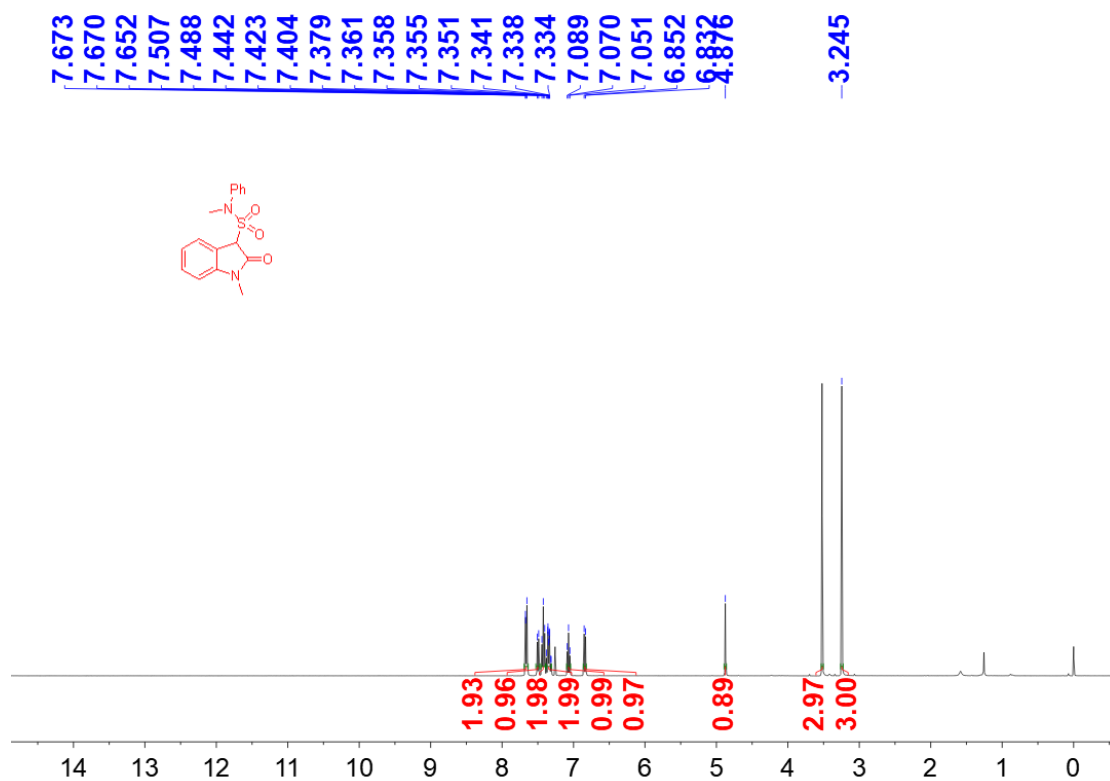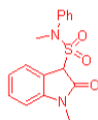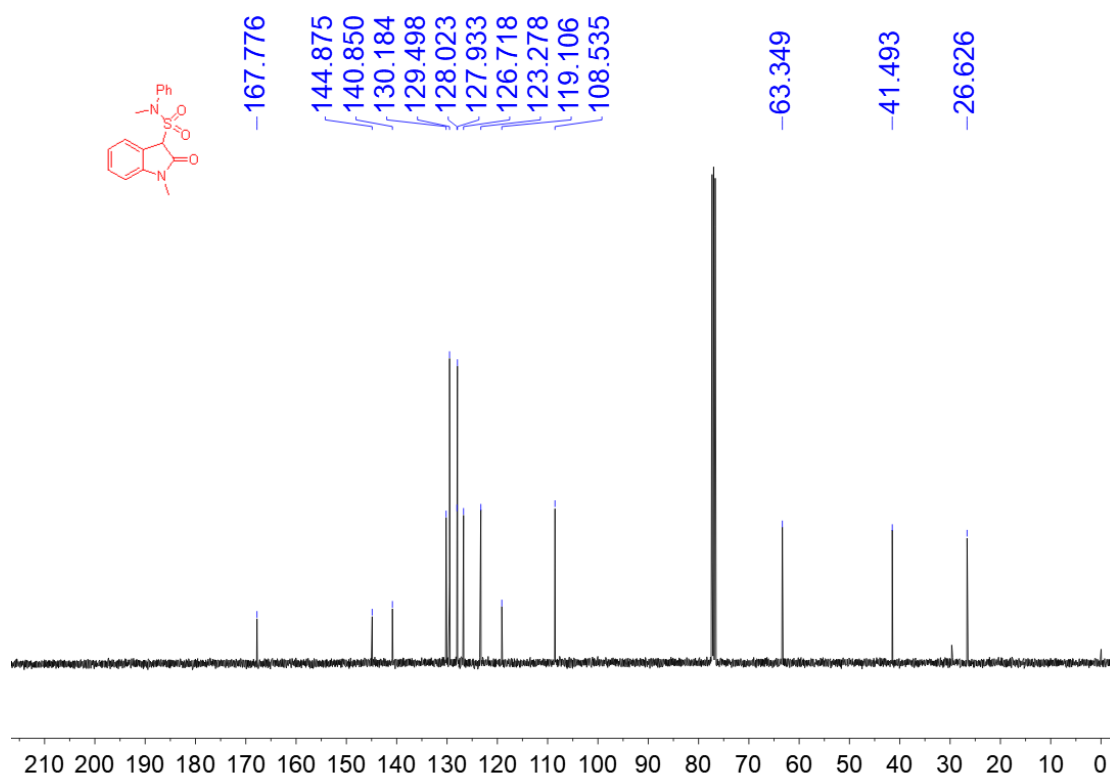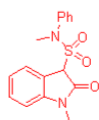

***N*-Methyl-2,2-dioxido-*N*,1-diphenyl-1,3-dihydrobenzo[*c*]isothiazole-3-carboxamide (2f)  
and 1-methyl-2-oxo-*N,N*-diphenylindoline-3-sulfonamide (3f):**

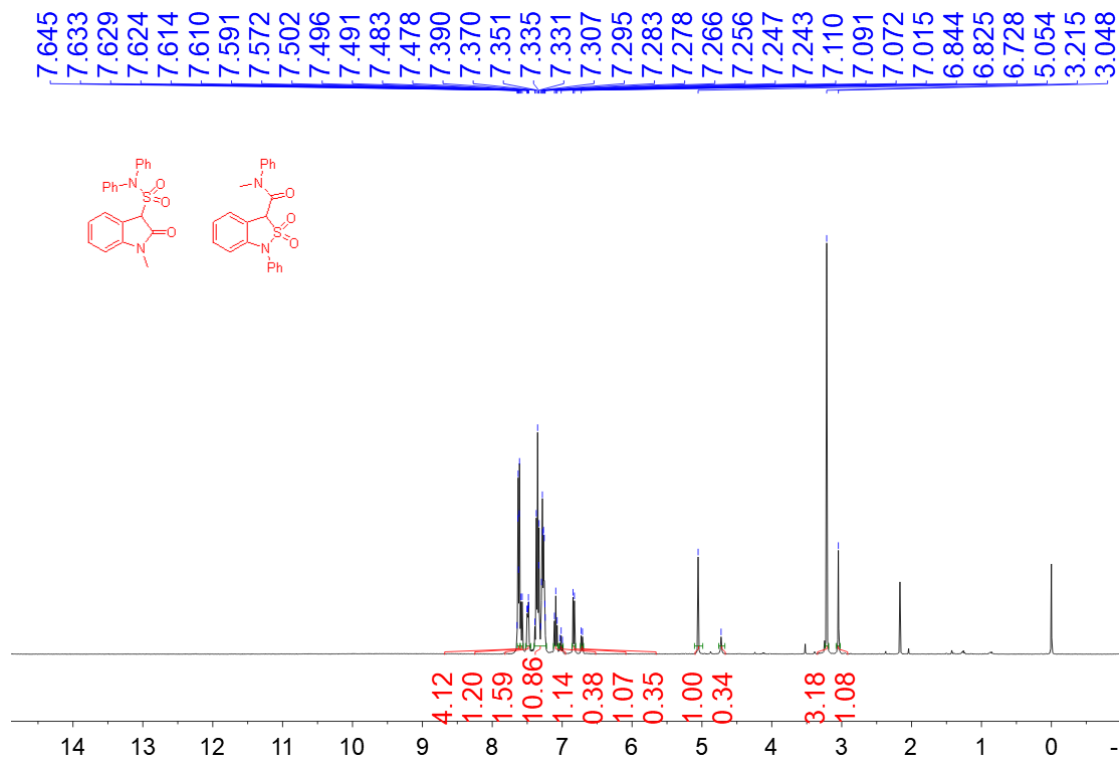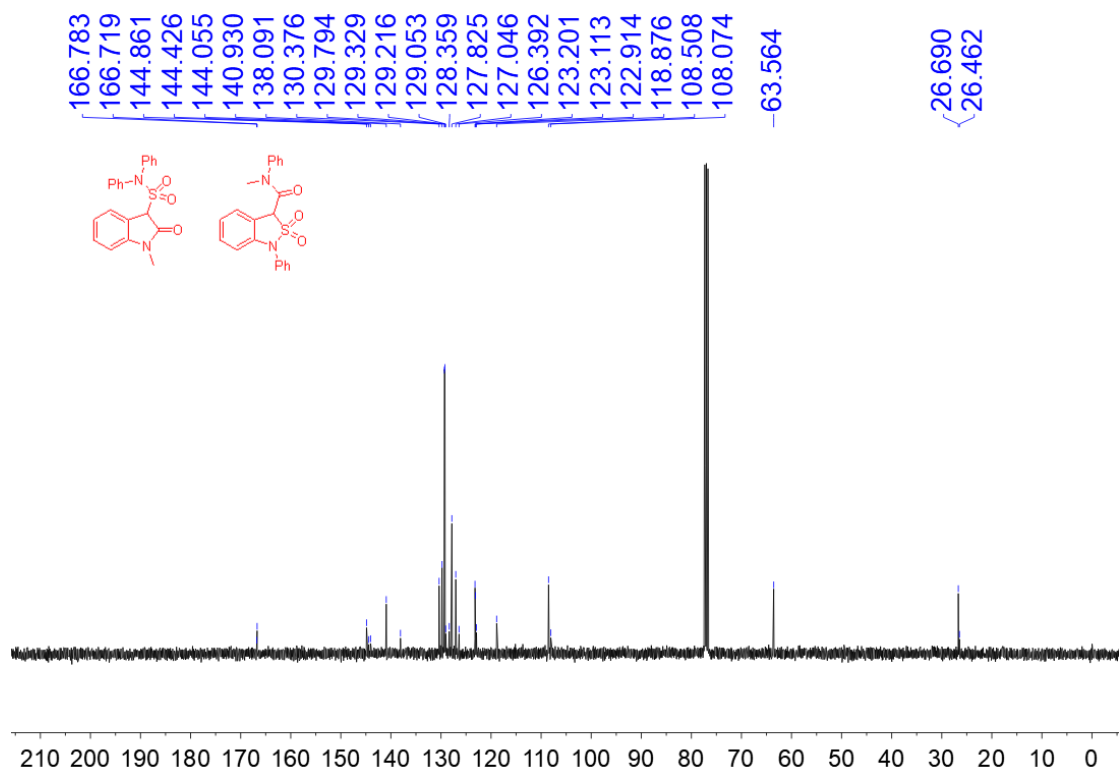

***N*-Methyl-2-oxo-*N*,1-diphenylindoline-3-sulfonamide (3g)**

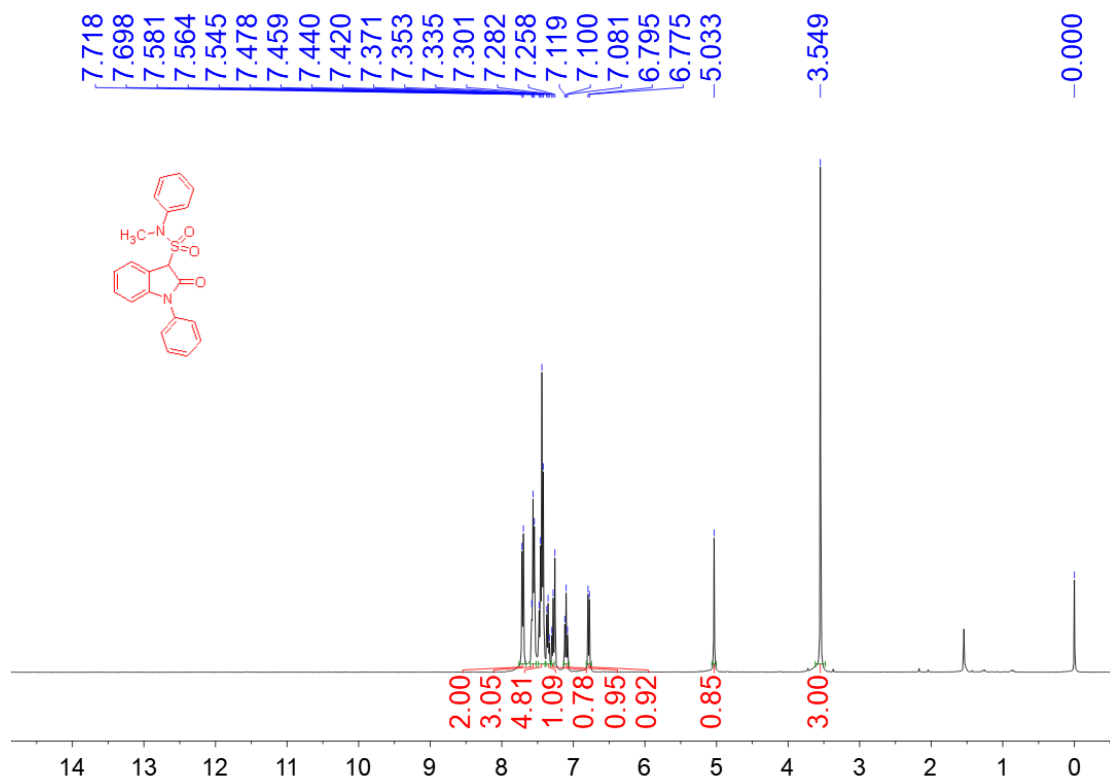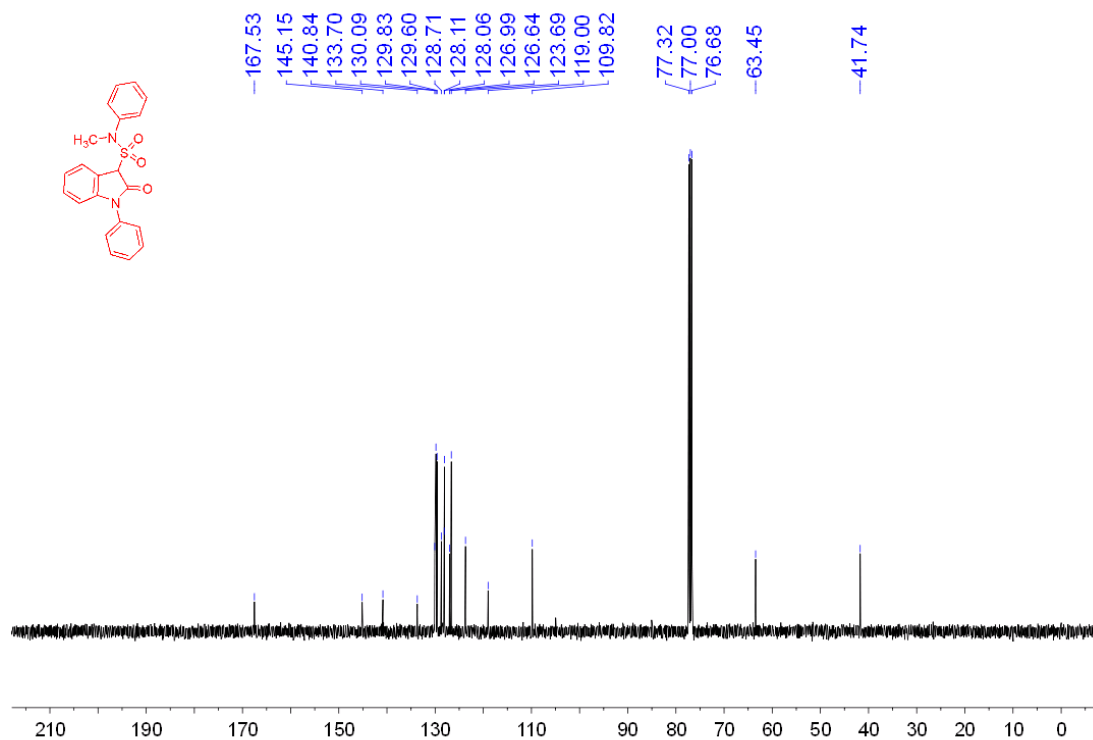

### 2-Oxo-*N,N*,1-triphenylindoline-3-sulfonamide (3h)

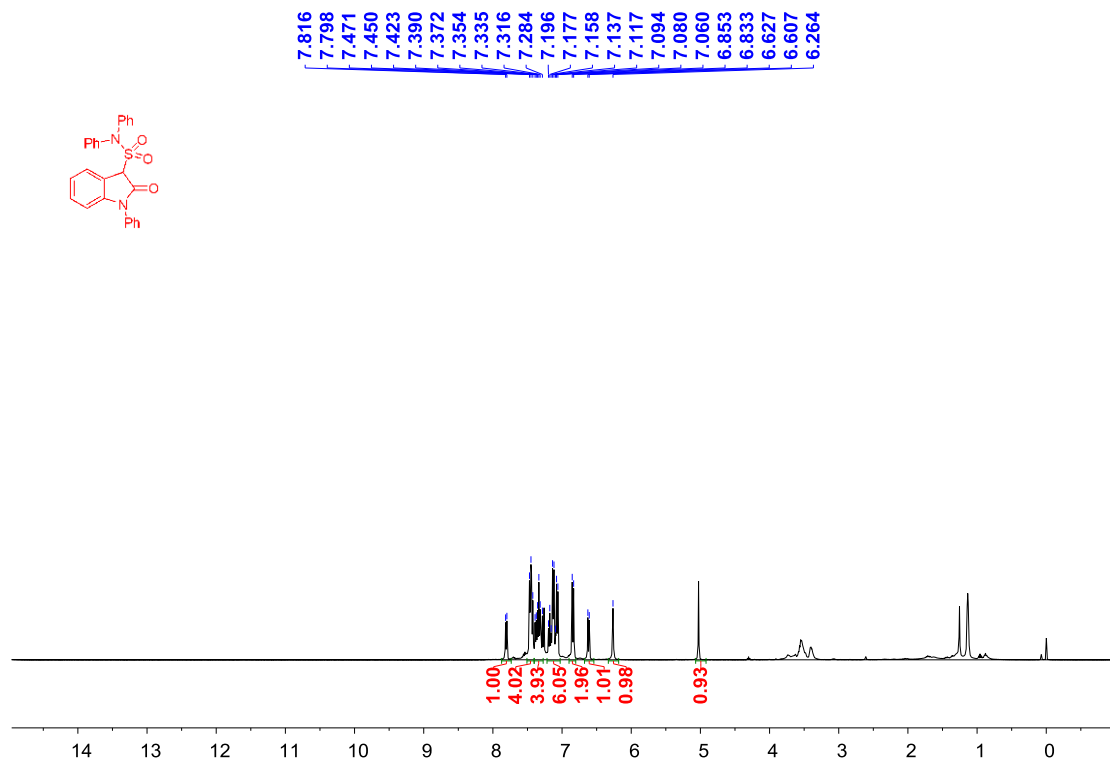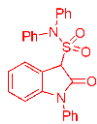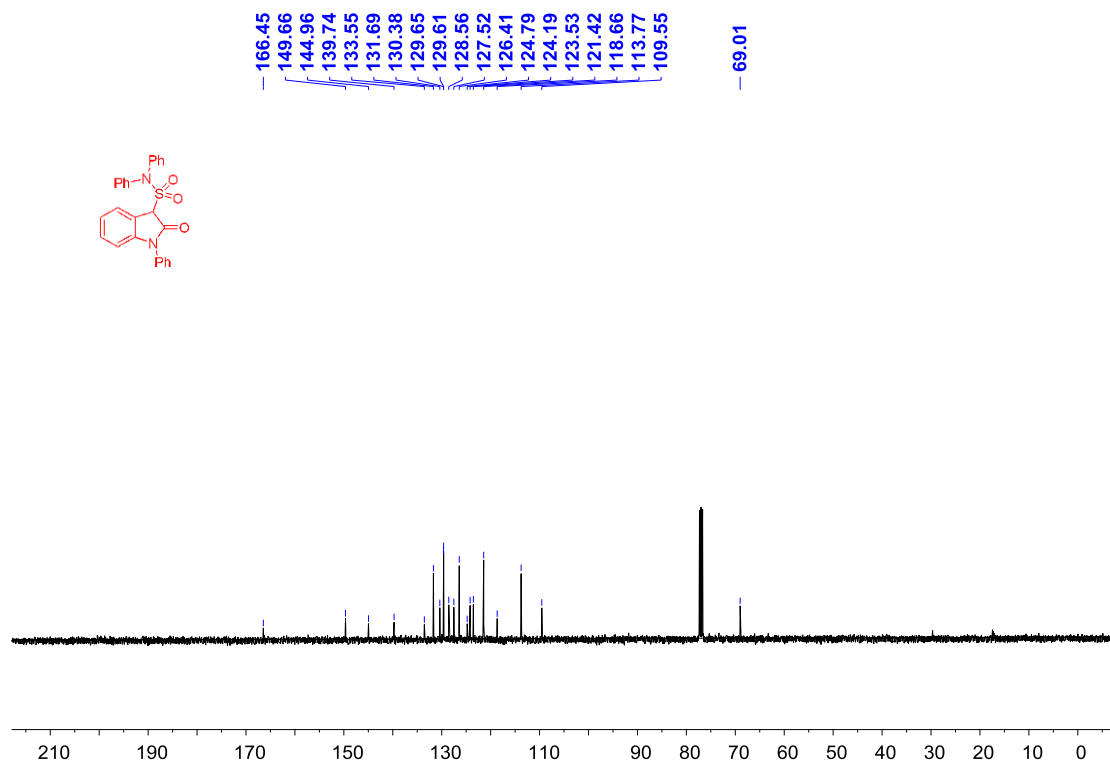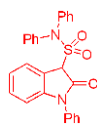

Supplement: s1 [file s1]
